# Supplementary material for: Mass Spectrometry-Based Untargeted Metabolomics and α-Glucosidase Inhibitory Activity of Lingzhi (Ganoderma lingzhi) During the Developmental Stages
Source: PubMed Central journal article supplement (PMC6600326; doi:10.3390/molecules24112044), 2019-05-29
Supplement: molecules-24-02044-s001.pdf [file molecules-24-02044-s001.pdf]

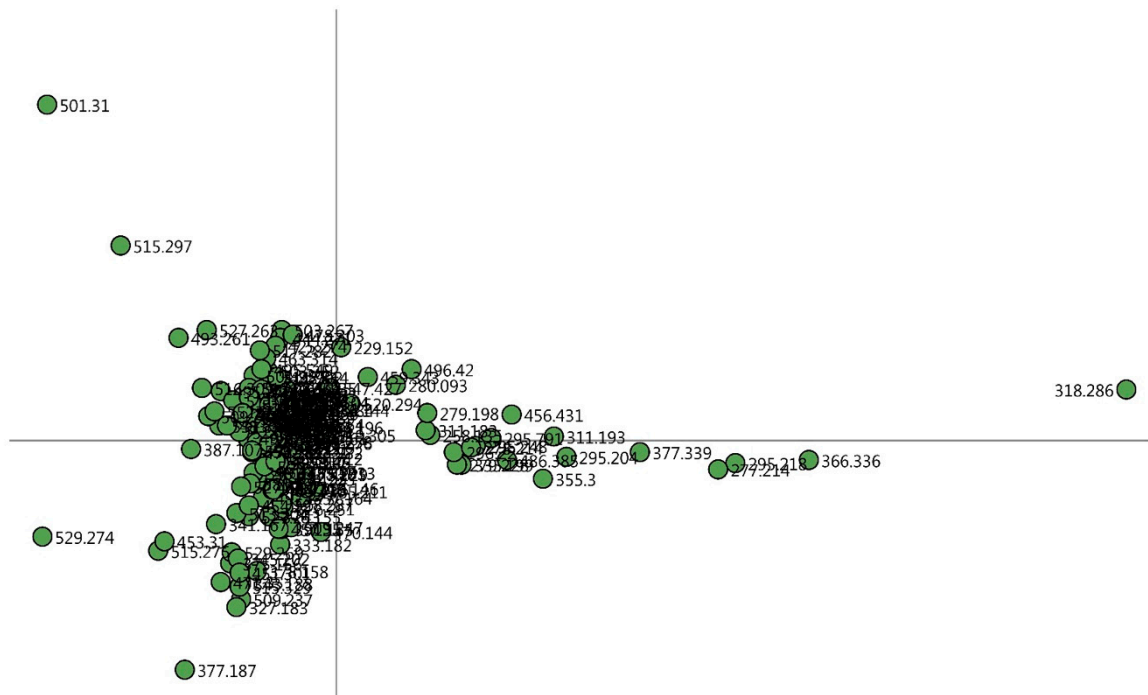

**Figure S2.** Principle Component Analysis (PCA) loading plot of metabolites derived from LC/IT-TOF-MS data sets of *Ganoderma lingzhi* at eight developmental stages.

**Table S1.** Tentatively identified chemical markers at eight developmental stages of *G. lingzhi* analyzed by GC/MS and LC/IT-TOF-MS.

| ID <sup>a</sup> | RT <sup>b</sup><br>(min) | RI <sup>c</sup><br>Exp. | Tentative identification   | \Delta RI | Match<br>correlation | Elemental<br>Formula | Exact<br>Mass | m/z<br>[M-H]- | Mass error<br> \Delta ppm | Mass Fragmentation                                          | ID<br>level <sup>d</sup> | Ref. |
|-----------------|--------------------------|-------------------------|----------------------------|-----------|----------------------|----------------------|---------------|---------------|---------------------------|-------------------------------------------------------------|--------------------------|------|
| 1*              | 5.04                     | 1056                    | Lactic acid                | 10        | 955                  |                      |               |               |                           | 147, <b>73</b> , 117, 191, 148, 190, 66, 149, 133, 118      | 2                        | [1]  |
| 2*              | 5.16                     | 1064                    | 5-Nonanol                  | N/A       | 605                  |                      |               |               |                           | <b>56</b> , 73, 159, 186, 75, 143, 145, 57, 59, 158         | 3                        |      |
| 3*              | 6.48                     | 1151                    | Putrescine                 | N/A       | 752                  |                      |               |               |                           | 174, <b>73</b> , 175, 216, 86, 142, 59, 176, 100, 160       | 3                        |      |
| 4*              | 7.62                     | 1227                    | Ethanolamine               | 42        | 876                  |                      |               |               |                           | <b>174</b> , 73, 175, 147, 100, 86, 176, 59, 130, 133       | 3                        | [2]  |
| 5*              | 8.20                     | 1268                    | Phosphoric acid            | 14        | 947                  |                      |               |               |                           | <b>299</b> , 300, 73, 314, 301, 133, 211, 283, 207, 315     | 2                        | [2]  |
| 6*              | 8.21                     | 1270                    | Glycerol                   | 12        | 940                  |                      |               |               |                           | 73, 147, 205, 117, <b>103</b> , 133, 218, 206, 148, 74      | 2                        | [2]  |
| 7*              | 8.82                     | 1310                    | Succinic acid              | 11        | 957                  |                      |               |               |                           | <b>147</b> , 73, 247, 75, 148, 149, 55, 129, 74, 172        | 2                        | [1]  |
| 8*              | 11.11                    | 1483                    | Malic acid                 | 3         | 944                  |                      |               |               |                           | <b>73</b> , 147, 233, 245, 133, 148, 189, 75, 190, 74       | 2                        | [3]  |
| 9*              | 12.70                    | 1615                    | Glutamic acid              | 11        | 918                  |                      |               |               |                           | 246, <b>73</b> , 247, 128, 147, 75, 248, 156, 348, 230      | 2                        | [3]  |
| 10*             | 13.81                    | 1716                    | Xylitol                    | 1         | 868                  |                      |               |               |                           | <b>73</b> , 147, 103, 205, 307, 129, 319, 204, 189, 148     | 2                        | [3]  |
| 11*             | 14.28                    | 1756                    | Glycerol-3-phosphate       | 19        | 956                  |                      |               |               |                           | <b>357</b> , 299, 147, 358, 315, 300, 211, 445, 370, 359    | 2                        | [2]  |
| 12*             | 14.68                    | 1792                    | Azelaic acid               | 15        | 825                  |                      |               |               |                           | <b>116</b> , 73, 75, 317, 243, 147, 217, 204, 201, 129, 230 | 2                        | [1]  |
| 13*             | 14.89                    | 1812                    | Citric acid                | 8         | 793                  |                      |               |               |                           | <b>273</b> , 147, 363, 347, 274, 375, 465, 211, 305, 364    | 2                        | [3]  |
| 14*             | 15.24                    | 1846                    | Myristic acid              | 4         | 878                  |                      |               |               |                           | 285, <b>117</b> , 73, 75, 129, 286, 145, 55, 131            | 2                        | [4]  |
| 15*             | 15.54                    | 1873                    | Fructose                   | 1         | 824                  |                      |               |               |                           | <b>219</b> , 73, 217, 103, 307, 147, 218, 308, 74, 117, 133 | 2                        | [3]  |
| 16*             | 16.03                    | 1922                    | Mannitol                   | 6         | 959                  |                      |               |               |                           | <b>73</b> , 319, 205, 147, 217, 103, 320, 307, 321, 117     | 2                        | [2]  |
| 17*             | 16.25                    | 1945                    | Pentadecanoic acid         | 4         | 883                  |                      |               |               |                           | 299, 117, 73, 75, 132, <b>129</b> , 145, 300, 55, 131       | 2                        | [2]  |
| 18*             | 17.21                    | 2044                    | Palmitic acid              | 6         | 961                  |                      |               |               |                           | <b>313</b> , 117, 73, 75, 132, 129, 145, 314, 55, 131       | 2                        | [5]  |
| 19*             | 17.57                    | 2082                    | Myo-Inositol               | 9         | 928                  |                      |               |               |                           | 305, 73, <b>217</b> , 147, 318, 191, 306, 204, 319, 265     | 2                        | [3]  |
| 20*             | 17.67                    | 2092                    | Linoleic acid methyl ester | 2         | 841                  |                      |               |               |                           | 67, 81, <b>95</b> , 55, 82, 79, 68, 96, 54, 109             | 2                        | [5]  |
| 21*             | 18.12                    | 2141                    | Margaric acid              | 8         | 902                  |                      |               |               |                           | <b>327</b> , 117, 73, 75, 132, 129, 145, 328, 55, 342       | 2                        | [1]  |
| 22*             | 18.83                    | 2211                    | Linoleic acid              | 1         | 874                  |                      |               |               |                           | 75, <b>73</b> , 337, 67, 81, 95, 79, 55, 82, 96             | 2                        | [1]  |
| 23*             | 20.26                    | 2388                    | 5-Methyluridine            | N/A       | 719                  |                      |               |               |                           | 73, 327, 147, 328, 75, 129, <b>217</b> , 103, 149, 74       | 3                        |      |

Table S1. Cont.

|      |       |      |                                                                               |     |     |                                                 |          |                                     |                                                  |                                    |     |        |
|------|-------|------|-------------------------------------------------------------------------------|-----|-----|-------------------------------------------------|----------|-------------------------------------|--------------------------------------------------|------------------------------------|-----|--------|
| 24*  | 21.37 | 2529 | Phthalic acid, bis(2-ethylhexyl) ester                                        | 10  | 881 |                                                 |          |                                     | 149, 167, 57, 71, 70, 150, 279, 113, 104, 83     | 2                                  | [6] |        |
| 25*  | 22.90 | 2735 | Trehalose                                                                     | 9   | 955 |                                                 |          |                                     | 361, 73, 362, 191, 217, 147, 363, 204, 103, 271  | 2                                  | [3] |        |
| 26*  | 23.18 | 2774 | Chrysophanol                                                                  | N/A | 774 |                                                 |          |                                     | 383, 147, 384, 57, 103, 385, 83, 55, 97, 485     | 3                                  |     |        |
| 27*  | 23.61 | 2834 | Lignoceric acid                                                               | 1   | 810 |                                                 |          |                                     | 117, 73, 425, 75, 132, 145, 129, 57, 55, 426     | 2                                  | [3] |        |
| 28*  | 23.87 | 2871 | Tricosyl alcohol                                                              | N/A | 784 |                                                 |          |                                     | 397, 398, 147, 129, 57, 75, 103, 399, 83, 55     | 3                                  |     |        |
| 29*  | 24.54 | 2968 | Lignoceryl alcohol                                                            | N/A | 790 |                                                 |          |                                     | 411, 73, 412, 147, 129, 57, 413, 75, 103, 83     | 3                                  |     |        |
| 30*  | 24.62 | 2984 | Eicosamethylcyclodecasiloxane                                                 | N/A | 767 |                                                 |          |                                     | 73, 147, 221, 355, 281, 429, 207, 356, 295, 219  | 3                                  |     |        |
| 31*  | 26.64 | 3228 | Ergosterol                                                                    | 4   | 731 |                                                 |          |                                     | 73, 69, 55, 75, 143, 129, 253, 81, 157, 169, 363 | 2                                  | [7] |        |
| 32*  | 26.83 | 3246 | Stellasterol                                                                  | N/A | 917 |                                                 |          |                                     | 75, 255, 69, 343, 55, 81, 73, 107, 105, 229      | 3                                  |     |        |
| 33** | 2.718 |      | Sucrose                                                                       |     |     | C <sub>12</sub> H <sub>22</sub> O <sub>11</sub> | 342.1162 | 387.1191                            | 5.4                                              | 387 > 341                          | 2   | [8]    |
|      |       |      |                                                                               |     |     |                                                 |          | [M+HCOO] <sup>-</sup>               |                                                  |                                    |     |        |
| 34** | 3.243 |      | Unknown 1                                                                     |     |     |                                                 |          | 290.0730                            |                                                  | 290 > 167                          | 4   |        |
| 35** | 4.789 |      | 3,12,20-Trihydroxy-7,11,15-trioxolanost-8,16,24-trien-26-oic acid             |     |     | C <sub>30</sub> H <sub>40</sub> O <sub>8</sub>  | 528.2723 | 527.2646                            | 0.8                                              | 527 > 509, 465, 421, 317           | 2   | [9]    |
| 36** | 5.154 |      | Ganodernoid F                                                                 |     |     | C <sub>31</sub> H <sub>44</sub> O <sub>8</sub>  | 544.3036 | 543.2933                            | 5.5                                              | 543 > 499, 481, 437, 367, 301      | 2   |        |
| 37** | 5.519 |      | Ganoderic acid I                                                              |     |     | C <sub>30</sub> H <sub>44</sub> O <sub>8</sub>  | 532.3036 | 531.3033                            | 13.2                                             | 531 > 513, 469, 401                | 1   | [9]    |
| 38** | 5.774 |      | Ganoderenic acid C                                                            |     |     | C <sub>30</sub> H <sub>44</sub> O <sub>7</sub>  | 516.3087 | 515.3044                            | 5.8                                              | 515 > 497, 481, 453, 435, 383, 193 | 1   | [9]    |
| 39** | 5.964 |      | Ganoderic acid C2                                                             |     |     | C <sub>30</sub> H <sub>46</sub> O <sub>7</sub>  | 518.3244 | 517.3163                            | 1.6                                              | 517 > 499, 481, 455, 437, 303, 287 | 1   | [9-11] |
| 40** | 6.741 |      | 3,12-Dihydroxy-4,4,14-trimethyl-7,11,15-trioxolanost-8,9,20,22-en-26-oic acid |     |     | C <sub>30</sub> H <sub>40</sub> O <sub>8</sub>  | 528.2723 | 527.2673                            | 4.4                                              | 527 > 525, 509, 483, 465           |     | [10]   |
| 41** | 7.289 |      | Ganoderic acid C6                                                             |     |     | C <sub>30</sub> H <sub>42</sub> O <sub>8</sub>  | 530.2880 | 529.2809                            | 0.4                                              | 529 > 527, 511, 467                | 1   | [9-11] |
| 42** | 8.131 |      | Ganoderenic acid B                                                            |     |     | C <sub>30</sub> H <sub>42</sub> O <sub>7</sub>  | 514.2931 | 513.2929                            | 13.8                                             | 513>469, 436, 301, 265             | 2   | [9-11] |
| 43** | 8.185 |      | Ganoderic acid B                                                              |     |     | C <sub>30</sub> H <sub>44</sub> O <sub>7</sub>  | 516.3087 | 497.2941                            | 6.4                                              | 497>453, 438, 409, 303, 287, 249   | 1   | [9-11] |
|      |       |      |                                                                               |     |     |                                                 |          | [M-H <sub>2</sub> O-H] <sup>-</sup> |                                                  |                                    |     |        |

Table S1. Cont.

|      |        |                                                                      |                                                |          |                                     |      |                                                        |   |        |
|------|--------|----------------------------------------------------------------------|------------------------------------------------|----------|-------------------------------------|------|--------------------------------------------------------|---|--------|
| 44** | 8.189  | Ganoderenic acid A                                                   | C <sub>30</sub> H <sub>42</sub> O <sub>7</sub> | 514.2930 | 513.2930                            | 14.0 | 513 > 495, 479, 465, 451, 433, 403, 381, 363, 301, 193 | 2 | [9]    |
| 45** | 8.244  | Ganoderic acid K                                                     | C <sub>32</sub> H <sub>46</sub> O <sub>9</sub> | 574.3142 | 555.3039                            | 13.7 | 499 > 481, 451, 437, 421, 367                          | 1 | [9–11] |
|      |        |                                                                      |                                                |          | [M-H <sub>2</sub> O-H] <sup>-</sup> |      |                                                        |   |        |
| 46** | 9.093  | Ganoderenic acid K                                                   | C <sub>32</sub> H <sub>44</sub> O <sub>9</sub> | 572.2985 | 571.2916                            | 0.5  | 553 > 538, 511, 494, 467, 449, 303                     | 2 | [9]    |
| 47** | 9.409  | 3,7-Dihydroxy-11,15,23-trioxolanost-8,16-dien-26-oic acid            | C <sub>30</sub> H <sub>42</sub> O <sub>7</sub> | 514.2930 | 513.2860                            | 0.4  | 513 > 495, 479, 433, 301, 193                          | 2 | [9]    |
| 48** | 9.734  | 12-Acetoxy-3-hydroxy-7,11,15,23-tetraoxolanost-8,20-dien-26-oic acid | C <sub>32</sub> H <sub>42</sub> O <sub>9</sub> | 570.2829 | 569.2869                            | 19.8 | 513 > 495, 451, 433, 301, 193                          | 2 | [9]    |
| 49** | 9.775  | Ganoderic acid H                                                     | C <sub>32</sub> H <sub>44</sub> O <sub>9</sub> | 572.2985 | 571.2887                            | 4.5  | 571 > 553 > 511, 467                                   | 1 | [9–11] |
| 50** | 10.493 | Ganoderic acid A                                                     | C <sub>30</sub> H <sub>44</sub> O <sub>7</sub> | 516.3087 | 515.2978                            | 4.5  | 515 > 497, 435, 301                                    | 1 | [9–11] |
| 51** | 11.284 | 12-Hydroxy-3,7,11,15,23-pentaoxo-lanost-8-en-26-oic acid             | C <sub>30</sub> H <sub>40</sub> O <sub>8</sub> | 528.2723 | 527.2687                            | 20.1 | 527 > 509                                              | 2 | [11]   |
| 52** | 11.670 | 12-Acetoxy-3-hydroxy-7,11,15-trioxolanost-8,16,24-trien-26-oic acid  | C <sub>32</sub> H <sub>42</sub> O <sub>8</sub> | 554.2880 | 553.2745                            | 11.2 | 553 > 511, 494, 467, 449, 301, 263                     | 2 | [9]    |
| 53** | 11.703 | 7,12-Dihydroxy-3,11,15,23-tetraoxo-lanost-8,20-dien-26-oic acid      | C <sub>30</sub> H <sub>40</sub> O <sub>8</sub> | 528.2723 | 527.2721                            | 13.5 | 527 > 509                                              | 3 | [9]    |
| 54** | 12.148 | Ganoderenic acid D                                                   | C <sub>30</sub> H <sub>40</sub> O <sub>7</sub> | 512.2774 | 511.2701                            | 7.24 | 511 > 495, 478, 449, 434, 405, 285, 261                | 1 | [9–11] |
| 55** | 12.494 | 12-Acetoxy-7-hydroxy-3,11,15-trioxolanost-8,16,24-trien-26-oic acid  | C <sub>32</sub> H <sub>42</sub> O <sub>8</sub> | 554.2880 | 553.2753                            | 12.1 | 511 > 493, 449, 434                                    | 2 | [9]    |
| 56** | 12.928 | Ganolucidic acid A                                                   | C <sub>30</sub> H <sub>44</sub> O <sub>6</sub> | 500.3138 | 499.3065                            | 5.2  | 499 > 482, 437, 419, 285, 269, 213                     | 2 | [9]    |
| 57** | 13.342 | 12-Acetoxy-7-hydroxy-3,11,15-trioxolanost-8,20-dien-26-oic acid      | C <sub>32</sub> H <sub>42</sub> O <sub>9</sub> | 570.2829 | 569.2725                            | 5.4  | 569 > 551 > 277                                        | 2 | [9]    |
| 58** | 13.514 | 12-Acetoxy-3,7,11,15,23-pentaoxolanost-8,20-dien-26-oic acid         | C <sub>32</sub> H <sub>40</sub> O <sub>9</sub> | 568.2672 | 567.2600                            | 16.7 | 549 > 507, 463                                         | 2 | [9]    |

Table S1. Cont.

|      |        |                    |                                                |          |          |      |                                              |   |     |
|------|--------|--------------------|------------------------------------------------|----------|----------|------|----------------------------------------------|---|-----|
| 59** | 14.548 | Ganoderenic acid F | C <sub>30</sub> H <sub>38</sub> O <sub>7</sub> | 510.2618 | 509.2656 | 21.8 | 509 > 491, 473, 465, 301, 261, 247, 217, 175 | 2 | [9] |
| 60** | 14.694 | Unknown 2          |                                                |          | 533.3317 |      | 533 > 487, 469                               |   |     |
| 61** | 14.913 | Unknown 3          |                                                |          | 535.3326 |      | 535 > 489, 371                               |   |     |
| 62** | 15.158 | Unknown 4          |                                                |          | 535.3543 |      | 535 > 445, 419                               |   |     |
| 63** | 16.761 | Unknown 5          |                                                |          | 553.2384 |      | 533 > 531, 487                               |   |     |
| 64** | 18.024 | Unknown 6          |                                                |          | 483.2261 |      | 483 > 465, 439, 421, 287, 233                |   |     |
| 65** | 18.415 | Unknown 7          |                                                |          | 483.2673 |      | 483 > 465, 421                               |   |     |
| 66** | 19.336 | Unknown 8          |                                                |          | 476.2464 |      | 476 > 279                                    |   |     |
| 67** | 19.975 | Unknown 9          |                                                |          | 341.1687 |      | 341 > 320, 297, 279, 159                     |   |     |
| 68** | 22.089 | Unknown 10         |                                                |          | 295.2411 |      | 295 > 277, 195, 171, 113                     |   |     |
| 69** | 22.560 | Unknown 11         |                                                |          | 293.1830 |      | 293 > 275, 249, 197, 185                     |   |     |
| 70** | 22.931 | Unknown 12         |                                                |          | 527.3350 |      | 527 > 525, 485, 467                          |   |     |
| 71** | 23.007 | Unknown 13         |                                                |          | 311.1089 |      | 311 > 182                                    |   |     |
| 72** | 25.556 | Unknown 14         |                                                |          | 475.2102 |      | 475 > 431                                    |   |     |
| 73** | 25.801 | Unknown 15         |                                                |          | 475.2904 |      | 475 > 431                                    |   |     |
| 74** | 29.860 | Unknown 16         |                                                |          | 355.2920 |      | 355 > 309                                    |   |     |

<sup>a</sup>Metabolites were selected according to VIP > 1.0 and p-value < 0.05 in PLS-DA (\*analyzed by GC/MS, \*\*analyzed by LC/IT-TOF-MS); <sup>b</sup>Retention time (RT) were corrected by data pre-processing software; <sup>c</sup>Retention index (RI) metabolites analyzed by GC/MS were normalized with n-alkanes; <sup>d</sup>The level of metabolite identification according to Metabolomics Standards Initiative [12]; <sup>e</sup>The structure were deduced from previous reports

## References

1. Isidorov, V.A.; Lech, P.; Żółciak, A.; Rusak, M.; Szczepaniak, L. Gas chromatographic–mass spectrometric investigation of metabolites from the needles and roots of pine seedlings at early stages of pathogenic fungi *Armillaria ostoyae* attack. *Trees* **2008**, *22*, 531.
2. Birkemeyer, C.; Kopka, J. Design of Metabolite Recovery by Variations of the Metabolite Profiling Protocol. In Proceedings of the Concepts in Plant Metabolomics; Nikolau, B.J., Wurtele, E.S., Eds.; Springer: Dordrecht, The Netherlands, 2007; pp. 45–69.

3. Erxleben, A.; Gessler, A.; Vervliet-Scheebaum, M.; Reski, R. Metabolite profiling of the moss *Physcomitrella patens* reveals evolutionary conservation of osmoprotective substances. *Plant Cell Rep.* **2012**, *31*, 427–436.
4. Isidorov, V.A.; Kotowska, U.; Vinogorova, V.T. GC Identification of Organic Compounds Based on Partition Coefficients of Their TMS Derivatives in a Hexane-Acetonitrile System and Retention Indices. *Anal. Sci.* **2005**, *21*, 1483–1489.
5. Kim, J.-S.; Chung, H.Y. GC-MS analysis of the volatile components in dried boxthorn (*Lycium chinensis*) fruit. *J. Korean Soc. Appl. Biol. Chem.* **2009**, *52*, 516–524.
6. Yaşar, A.; Üçüncü, O.; Güleç, C.; İnceer, H.; Ayaz, S.; Yayl, N. GC-MS Analysis of Chloroform Extracts in Flowers, Stems, and Roots of *Tripleurospermum callosum*. *Pharm. Biol.* **2005**, *43*, 108–112.
7. Radulović, N.S.; Đorđević, N.D. Steroids from Poison Hemlock (*Conium maculatum* L.): A GC-MS analysis. *J. Serbian Chem. Soc.* **2011**, *76*, 1471–1483.
8. Qian, Z.; Zhao, J.; Li, D.; Hu, D.; Li, S. Analysis of global components in *Ganoderma* using liquid chromatography system with multiple columns and detectors. *J. Sep. Sci.* **2012**, *35*, 2725–2734.
9. Cheng, C.-R.; Yang, M.; Wu, Z.-Y.; Wang, Y.; Zeng, F.; Wu, W.-Y.; Guan, S.-H.; Guo, D.-A. Fragmentation pathways of oxygenated tetracyclic triterpenoids and their application in the qualitative analysis of *Ganoderma lucidum* by multistage tandem mass spectrometry. *Rapid Commun. Mass Spectrom.* **2011**, *25*, 1323–1335.
10. Wu, L.; Liang, W.; Chen, W.; Li, S.; Cui, Y.; Qi, Q.; Zhang, L. Screening and Analysis of the Marker Components in *Ganoderma lucidum* by HPLC and HPLC-MSn with the Aid of Chemometrics. *Molecules* **2017**, *22*, 584.
11. Yang, M.; Wang, X.; Guan, S.; Xia, J.; Sun, J.; Guo, H.; Guo, D. Analysis of triterpenoids in *Ganoderma lucidum* using liquid chromatography coupled with electrospray ionization mass spectrometry. *J. Am. Soc. Mass Spectrom.* **2007**, *18*, 927–939.
12. Blaženović, I.; Kind, T.; Ji, J.; Fiehn, O. Software Tools and Approaches for Compound Identification of LC-MS/MS Data in Metabolomics. *Metabolites* **2018**, *8*, 31.
